# Supplementary material for: Are They the Same for All People? Nurses’ Knowledge about the Basic Human Needs of People with Disabilities
Source: MDPI journal article supplement (doi:10.3390/bs13010068), 2023-01-12
Supplement: s1 [file s1]

---

**Supplementary Table S1.** Knowledge of Basic Human Needs Scale (KBHNS) questionnaire based on Maslow's hierarchy of basic human needs.

---

**1. General nurses' knowledge about people with disabilities**

- 1.1. Basic human needs are the same for all people.
  - 1.2. \*People with disabilities have different basic human needs when compared with people without disabilities.
  - 1.3. People with disabilities have different degrees of independence in meeting their needs.
  - 1.4. People with disabilities have different ways of satisfying their basic human needs.
  - 1.5. People with disabilities should participate independently and equally in social activities.
- 

**2. Knowledge about physiological needs of people with disabilities**

- 2.1. Physiological needs of people with disabilities are divided into survival needs and stimulation needs.
  - 2.2. In general, the physiological needs of people with disabilities need to be satisfied promptly.
  - 2.3. Self-care is one of the important activities in meeting physiological needs for people with disabilities.
  - 2.4. Rest and sleep for a person with a disability are essential to relieve tension.
  - 2.5. The reduced mobility of a disabled person is characterized by the need for help from another person in movement activities.
- 

**3. Knowledge about safety needs of people with disabilities**

- 3.1. Safety needs are important for survival, but not as physiological needs.
  - 3.2. The need for personal hygiene in people with disabilities belongs to safety needs.
  - 3.3. Meeting the need for personal hygiene affects the development of self-confidence in people with disabilities.
  - 3.4. Meeting the need for personal hygiene in people with disabilities aids in the prevention of infections and pressure ulcers.
  - 3.5. Avoiding harmful influences and preventing falls, injuries, and infections increases the sense of security in people with disabilities.
- 

**4. Knowledge about affiliative needs of people with disabilities**

- 4.1. It is necessary to respect the spiritual needs of persons with disabilities.
  - 4.2. The need for love and belonging in people with disabilities is met through communication.
  - 4.3. Belonging needs include the religious needs of people with disabilities.
  - 4.4. Communication disorders may cause social isolation of a person with a disability.
  - 4.5. Verbalization of the feeling of loneliness may indicate the social isolation of a person with a disability.
- 

**5. Knowledge about self-esteem needs of people with disabilities**

- 5.1. \*Self-esteem and self-confidence in persons with disabilities are synonymous.
  - 5.2. Inability to meet basic human needs can have a strong impact on self-esteem, self-confidence, and self-image.
  - 5.3. In people whose health damage took place suddenly, there can be a strong decline in self-esteem and self-confidence.
  - 5.4. Disturbance of self-concept (i.e., altered self-image) includes a feeling of inferiority.
  - 5.5. It is necessary to encourage people with disabilities to rely on their strengths.
- 

**6. Knowledge about self-actualization needs of people with disabilities**

- 6.1. Learning belongs to the need for self-actualization.
  - 6.2. Self-actualization in persons with disabilities includes realizing the best potential that a person has.
  - 6.3. In achieving independence and self-actualization of people with disabilities, knowledge about specific problems is essential.
  - 6.4. In every contact with a person with a disability and their family, we should consider how to increase their level of knowledge.
  - 6.5. \*Counseling a person with a disability should be in the sense of suggesting or supervising certain behavior.
- 

Note: The Knowledge of Basic Human Needs Scale (KBHNS) questionnaire assesses nurses' knowledge about the basic human needs of people with disabilities. Answers were scored on a Likert scale ranging from 1 to 5: 1 = completely incorrect; 2 = incorrect; 3 = partially correct; 4 = correct; 5 = completely correct. Items with \*(1.2., 5.1.; 6.5.) were scored in reverse. The sum for each of the components ranges from 5 to 25. The sum of all 30 items in the whole questionnaire ranges from 30 to 150. A higher score denotes a higher knowledge about the basic human needs of people with disabilities.

---

**Supplementary Table S2.** Differences in knowledge about basic human needs according to the nurses' sociodemographic characteristics (N = 160).

| Variable                  | General knowledge | Physiological needs | Safety needs | Affiliative needs | Self-esteem | Self-actualization |
|---------------------------|-------------------|---------------------|--------------|-------------------|-------------|--------------------|
| Gender                    |                   |                     |              |                   |             |                    |
| Female                    | 20.0 (3.0)        | 20.0 (5.0)          | 21.0 (3.5)   | 21.0 (5.0)        | 21.0 (3.0)  | 20.0 (4.0)         |
| Male                      | 18.5 (5.5)        | 20.0 (6.8)          | 21.0 (3.3)   | 21.0 (3.3)        | 20.0 (1.5)  | 18.0 (4.5)         |
| <i>p</i> *                | 0.630             | 0.564               | 0.759        | 0.532             | 0.568       | 0.280              |
| Education                 |                   |                     |              |                   |             |                    |
| High school degree        | 19.0 (4.0)        | 20.0 (5.0)          | 21.0 (3.5)   | 21.0 (4.5)        | 20.0 (3.0)  | 20.0 (4.0)         |
| Bachelor's degree         | 20.5 (4.0)        | 20.0 (5.0)          | 21.0 (3.8)   | 21.0 (5.6)        | 21.0 (3.01) | 20.0 (4.0)         |
| Master's degree           | 21.0 (7.5)        | 20.5 (9.8)          | 23.0 (7.0)   | 23.0 (1.5)        | 20.0 (5.0)  | 22.5 (3.8)         |
| <i>p</i> †                | 0.008             | 0.331               | 0.921        | 0.498             | 0.267       | <0.001             |
| Study at a nursing school |                   |                     |              |                   |             |                    |
| Yes                       | 19.0 (4.0)        | 20.0 (6.0)          | 18.0 (6.0)   | 20.0 (2.0)        | 19.0 (3.0)  | 20.0 (4.0)         |
| No                        | 20.0 (3.0)        | 20.0 (5.0)          | 21.0 (3.0)   | 21.0 (5.0)        | 20.1 (3.0)  | 20.0 (3.5)         |
| <i>p</i> *                | 0.395             | 0.614               | 0.003        | 0.051             | 0.112       | 0.873              |
| Place of work             |                   |                     |              |                   |             |                    |
| Stationary department     | 20.0 (3.0)        | 20.0 (5.0)          | 21.0 (4.0)   | 21.0 (5.0)        | 20.0 (3.0)  | 20.0 (4.0)         |
| Outpatients' clinic       | 19.0 (5.0)        | 20.0 (4.0)          | 21.0 (5.0)   | 22.0 (3.5)        | 21.0 (2.5)  | 19.0 (4.5)         |
| <i>p</i> *                | 0.152             | 0.820               | 0.059        | 0.668             | 0.309       | 0.852              |
| Length of service (years) |                   |                     |              |                   |             |                    |
| Fewer than 10             | 19.0 (4.0)        | 19.0 (3.5)          | 20.0 (3.0)   | 21.0 (3.5)        | 20.0 (3.5)  | 20.0 (4.0)         |
| 11-20                     | 20.0 (3.5)        | 20.0 (6.0)          | 21.0 (4.0)   | 21.0 (6.0)        | 21.0 (5.0)  | 21.0 (5.0)         |
| 21-30                     | 21.0 (2.5)        | 21.0 (6.0)          | 21.0 (4.5)   | 23.0 (5.0)        | 21.0 (2.0)  | 20.0 (3.0)         |
| 31 and over               | 19.0 (3.5)        | 20.0 (4.5)          | 21.0 (4.0)   | 21.0 (4.5)        | 21.0 (3.0)  | 20.0 (3.0)         |
| <i>p</i> †                | 0.267             | 0.347               | 0.015        | 0.194             | 0.590       | 0.550              |

Note: The parameter estimates in each column are the median (interquartile range) of nurses' knowledge; *p* < 0.005; \*Mann-Whitney U test; †Kruskal-Wallis test.
